# Supplementary material for: Development of Binder-Free Three-Dimensional Honeycomb-like Porous Ternary Layered Double Hydroxide-Embedded MXene Sheets for Bi-Functional Overall Water Splitting Reactions
Source: MDPI journal article supplement (doi:10.3390/nano12162886), 2022-08-22
Supplement: s1 [file s1]

Supporting Information

# Development of Binder-Free Three-Dimensional Honeycomb-like Porous Ternary Layered Double Hydroxide-Embedded MXene Sheets for Bi-Functional Overall Water Splitting Reactions

Sajjad Hussain <sup>1,2</sup>, Dhanasekaran Vikraman <sup>3</sup>, Ghazanfar Nazir <sup>2</sup>, Muhammad Taqi Mehran <sup>4</sup>, Faisal Shahzad <sup>5</sup>, Khalid Mujasam Batoo <sup>6</sup>, Hyun-Seok Kim <sup>3</sup> and Jongwan Jung <sup>1,2,\*</sup>

<sup>1</sup> Hybrid Materials Center (HMC), Sejong University, Seoul 05006, Korea

<sup>2</sup> Department of Nanotechnology and Advanced Materials Engineering, Sejong University, Seoul 05006, Korea

<sup>3</sup> Division of Electronics and Electrical Engineering, Dongguk University-Seoul, Seoul 04620, Korea

<sup>4</sup> School of Chemical and Materials Engineering (SCME), National University of Sciences & Technology (NUST), Islamabad 44000, Pakistan

<sup>5</sup> Department of Metallurgy and Materials Engineering, Pakistan Institute of Engineering and Applied Sciences (PIEAS), Islamabad 45650, Pakistan

<sup>6</sup> King Abdullah Institute for Nanotechnology, King Saud University, Riyadh 11451, Saudi Arabia

\* Correspondence: jwjung@sejong.ac.kr; Tel.: +82-2-3408-3688; Fax: +82-2-3408-4342

## Characterizations:

The prepared structures were confirmed using X-ray diffraction (XRD; Rigaku D/max-2500 diffractometer) analysis with Cu-K $\alpha$  radiance. X-ray photoelectron spectroscopy (XPS) was performed using PHI 5000 Versa Probe (Al K $\alpha$  radiation source, 25 W,  $6.7 \times 10^{-8}$  Pa). The variations in the surface morphology of the prepared nanostructures were validated using transmission electron microscopy (TEM; JEOL-2010F) and X-ray elemental analysis combined with field-emission scanning electron microscopy (FESEM; JEOL JSM-6700F).

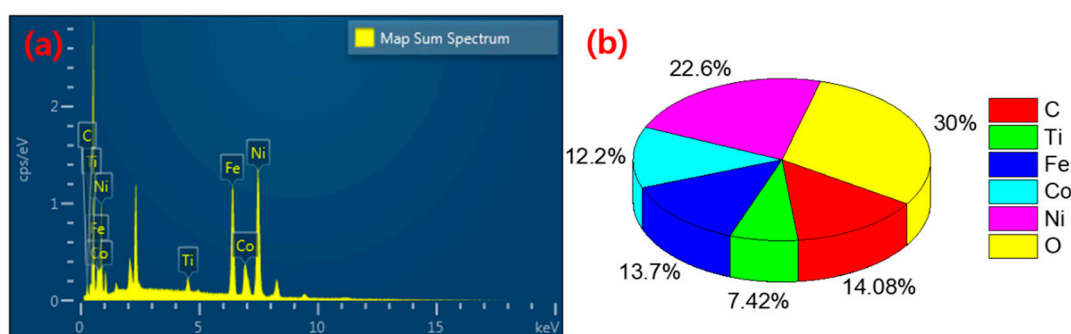

**Figure S1.** (a) SEM-EDX spectrum analysis of NiFeCo-LDH@MXene; (b) elemental wt % their element distribution for Ni, Fe, Co, Ti, and C.

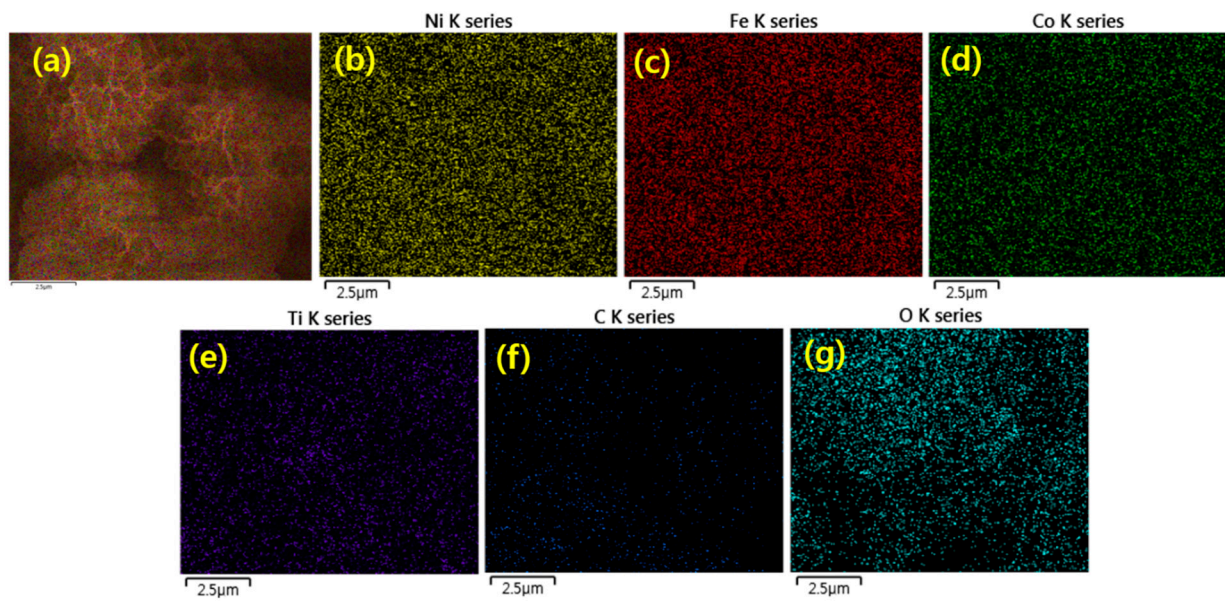

**Figure S2.** (a) FESEM image of NiFeCo-LDH@MXene and (b–f) their elemental mapping images; (b) Ni ; (c) Fe ; (d) ;Co ; (e) Ti and (f) C elements.

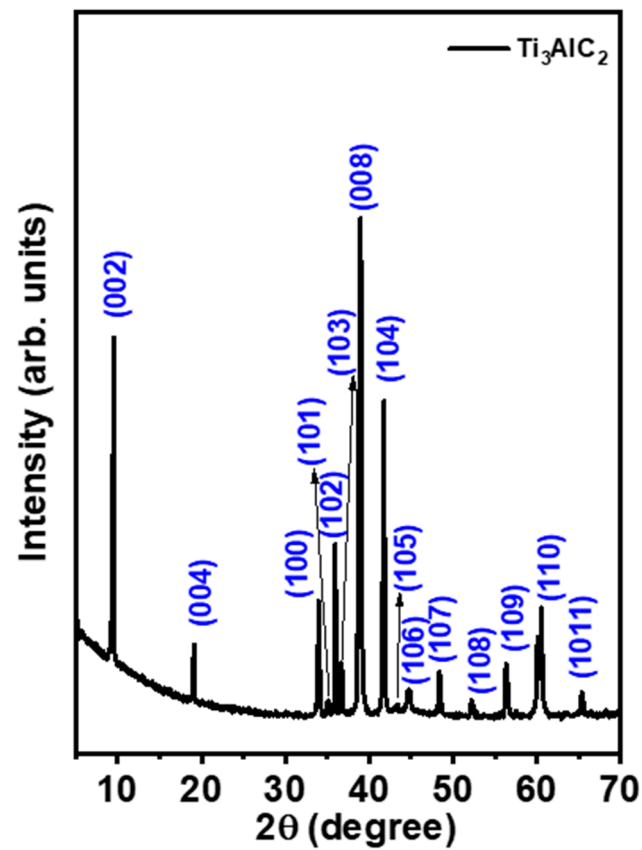

**Figure S3.** XRD pattern of MAX phase  $\text{Ti}_3\text{AlC}_2$ .

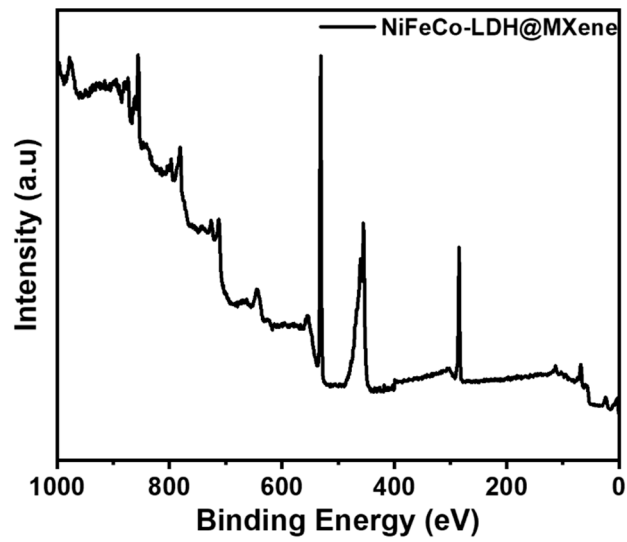

Figure S4. XPS survey spectrum of NiFeCo-LDH@MXene.

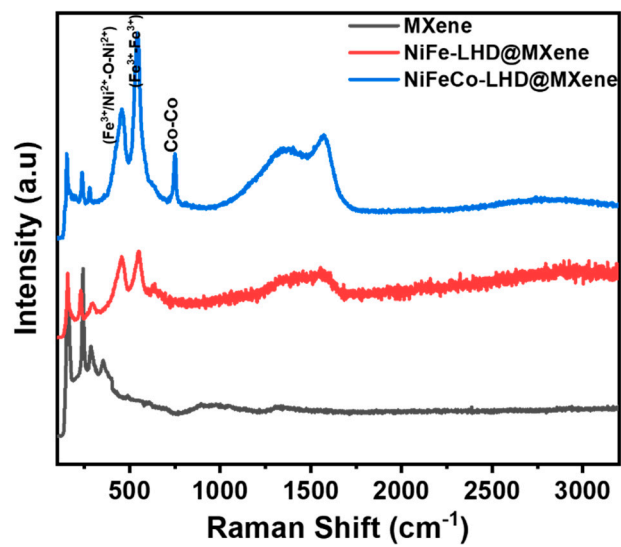

Figure S5. Raman spectrum of MXene, NiFe-LDH@MXene and NiFeCo-LDH@MXene.

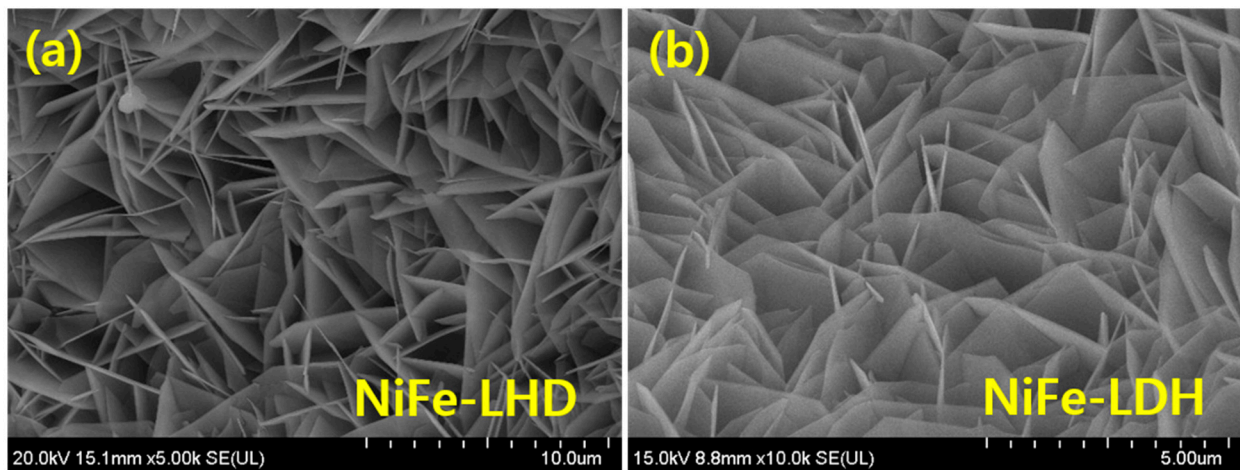

Figure S6. SEM images of NiFe-LDH (a) low and (b) high magnification.

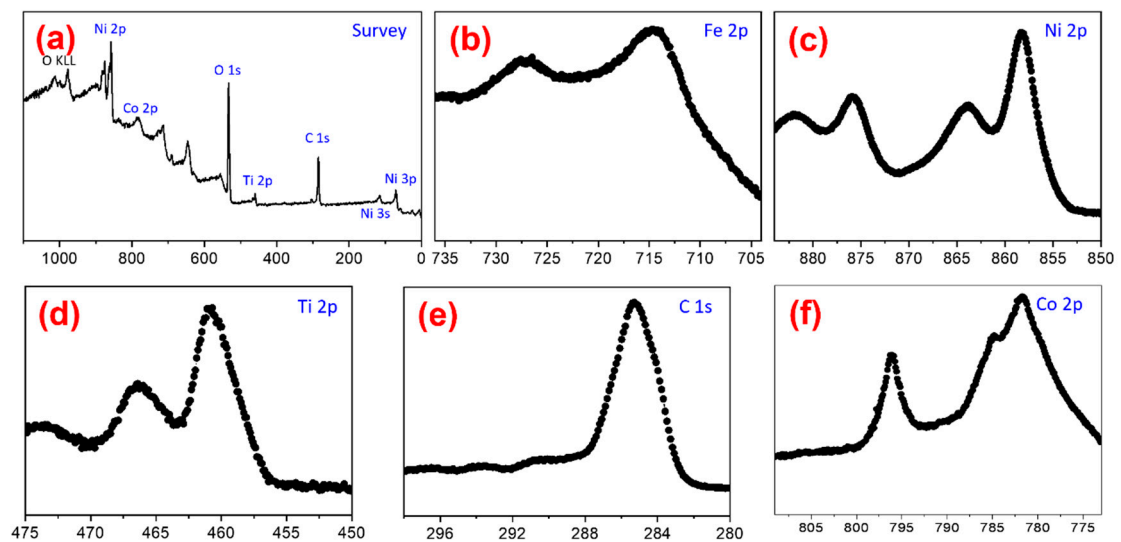

Figure S7. XPS analysis of NiFeCo-LDH@MXene hybrid after 24 h OER performance: (a) survey scan; (b) Fe 2p; (c) Ni 2p; (d) Ti 2p; (e) and (f) Co 2p binding energy.

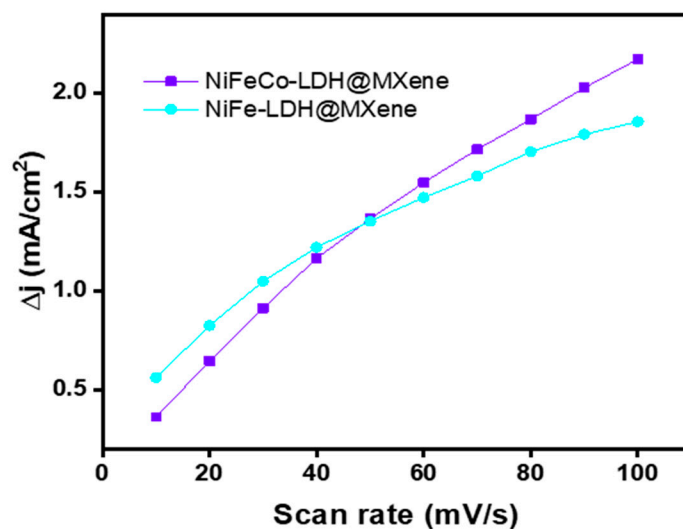

**Figure S8.** CV profiles current variation at different scan rate at 0.9 V vs RHE for NiFe-LDH@MXene and NiFeCo-LDH@MXene.

#### ESA calculation:

ESA were evaluated using the following relation:

$$ESA = C_{dl} / C_s$$

where,  $C_{dl}$  is the double layer capacitance and  $C_s$  is the specific capacitance.  $C_s = 0.040 \text{ mF.cm}^{-2}$  for 1 M KOH.[1]  $C_{dl}$  values were estimated by the relation  $i_d = \nu C_{dl}$ , where  $i_d$  is the current differences from double layer anodic and cathodic current density,  $\nu$  is the scan rate and  $C_{dl}$  value evaluated from the fitted slope value.

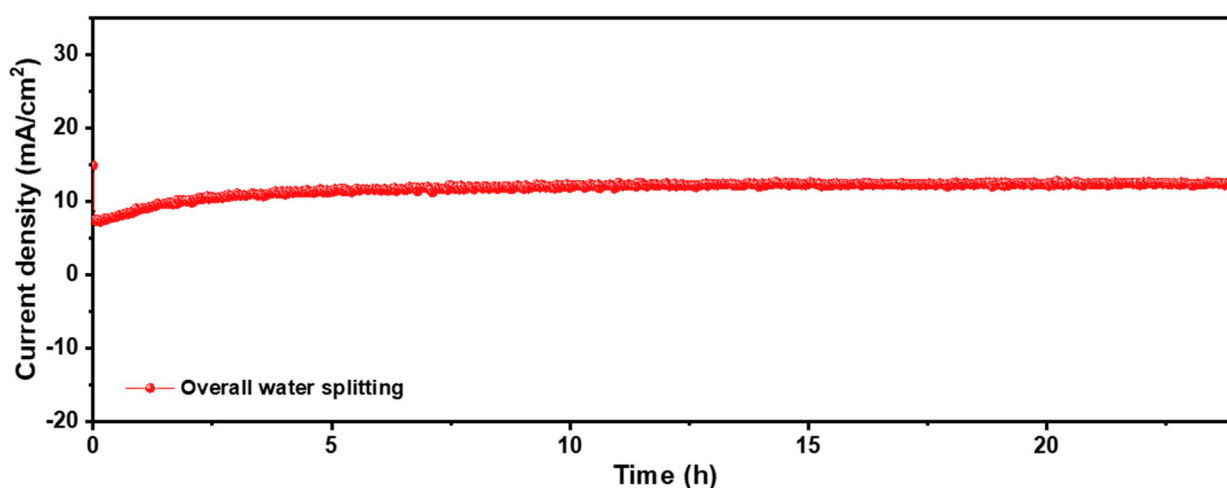

**Figure S9.** Time dependent current density variations of NiFe-LDH@MXene || NiFe-LDH@MXene device at a constant applied voltage for continuous water splitting operation over 24 h

**Table S1.** HER catalytic performances LHD-based electrocatalysts.

| Electrocatalyst                                                      | Electrolyte                          | $\eta$ (mV)                  | Tafel Slope (mV·dec <sup>-1</sup> ) | Ref       |
|----------------------------------------------------------------------|--------------------------------------|------------------------------|-------------------------------------|-----------|
| NiFeCo-LHD@MXene                                                     | 1M KOH                               | 34 @ 10 mA/cm <sup>2</sup>   | 62                                  | This work |
| FeNi <sub>3</sub> N/NF                                               | 1M KOH                               | 75 @ 10 mA/cm <sup>2</sup>   | 98                                  | [2]       |
| NiS/Ni                                                               | 1M KOH                               | 158 @ 20 mA/cm <sup>2</sup>  | 83                                  | [3]       |
| np-(Co <sub>0.52</sub> Fe <sub>0.48</sub> ) <sub>2</sub> P           | 1M KOH                               | 79 @ 20 mA/cm <sup>2</sup>   | 40                                  | [4]       |
| V-Ti <sub>4</sub> N <sub>3</sub> T <sub>x</sub>                      | 0.5 M H <sub>2</sub> SO <sub>4</sub> | 300 @ 10 mA/cm <sup>2</sup>  | 190                                 | [5]       |
| FeNi@MXene (Mo <sub>2</sub> TiC <sub>2</sub> T <sub>x</sub> )        | 1M KOH                               | 160@ 10 mA/cm <sup>2</sup>   | 103.46                              | [6]       |
| V-Ni <sub>3</sub> S <sub>2</sub> /Ni <sub>x</sub> P <sub>y</sub> /NF | 1M KOH                               | 90@ 10 mA/cm <sup>2</sup>    | 94.9                                | [7]       |
| NiFeCoP/NF Nanorod                                                   | 1M KOH                               | 82.7@10 mA/cm                | 84.8                                | [8]       |
| Ru-NiCoP/NF                                                          | 1M KOH                               | 32.33@ 10 mA/cm <sup>2</sup> | 60.97                               | [9]       |
| NiFe/NiCo <sub>2</sub> O <sub>4</sub> /Ni                            | 1M KOH                               | 105@10 mA/cm                 | 88                                  | [10]      |
| np-NiFeCoP                                                           | 1M KOH                               | 105@10 mA/cm                 | 61.7                                | [11]      |
| BNNS@Ti <sub>3</sub> C <sub>2</sub>                                  | 0.5M H <sub>2</sub> SO <sub>4</sub>  | 52@10 mA/cm                  | 39                                  | [12]      |
| IrCo@ac-Ti <sub>3</sub> C <sub>2</sub>                               | 1M KOH                               | 220@10 mA/cm                 | 60                                  | [13]      |
| CoP/Mo <sub>2</sub> CT <sub>x</sub>                                  | 1M KOH                               | 78@10 mA/cm                  | 66                                  | [14]      |
| Ni-Co-Sn                                                             | 1M KOH                               | 76@10 mA/cm                  | 63                                  | [15]      |
| Pt-V2CT <sub>x</sub> MXene                                           | 0.5M H <sub>2</sub> SO <sub>4</sub>  | 27@10 mA/cm                  | 36.5                                | [16]      |
| p-NFNr@Ni-Co-P                                                       | 1M KOH                               | 125@10 mA/cm                 | 85                                  | [17]      |
| MoS <sub>2</sub> @Mo <sub>2</sub> CT <sub>x</sub>                    | 0.5M H <sub>2</sub> SO <sub>4</sub>  | 176@10 mA/cm                 | 207                                 | [18]      |
| Au/Ni <sub>3</sub> S <sub>2</sub>                                    | 1M KOH                               | 97@10 mA/cm                  | 72                                  | [19]      |
| FeNi@Mo <sub>2</sub> TiC <sub>2</sub> T <sub>x</sub> @NF             | 0.5M H <sub>2</sub> SO <sub>4</sub>  | 165@10 mA/cm                 | 103.46                              | [6]       |
| PtOaPdOb nanoparticles@Ti <sub>3</sub> C <sub>2</sub> T <sub>m</sub> | 0.5M H <sub>2</sub> SO <sub>4</sub>  | 26.5@10 mA/cm                | 39                                  | [20]      |
| M <sub>3</sub> OOH@V <sub>4</sub> C <sub>3</sub> T <sub>x</sub>      | 1M KOH                               | 275.2@10 mA/cm               | 51.4                                | [21]      |
| CoP/Ni <sub>2</sub> P@HPNCP                                          | 1M KOH                               | 106@10 mA/cm                 | 65.9                                | [22]      |
| Ti <sub>2</sub> NT <sub>x</sub> @MOF-CoP                             | 1M KOH                               | 112@10 mA/cm                 | 67.1                                | [23]      |
| Mo-NiCoP                                                             | 1M KOH                               | 76@10 mA/cm                  | 60                                  | [24]      |
| NiFe-LDH/MXene-RGO                                                   | 1M KOH                               | 362@10 mA/cm                 | 100                                 | [25]      |

**Table S2.** OER catalytic performances LHD-based electrocatalysts.

| Electrocatalyst                                                             | Electrolyte | $\eta$ (mV)                   | Tafel Slope (mV·dec <sup>-1</sup> ) | Ref       |
|-----------------------------------------------------------------------------|-------------|-------------------------------|-------------------------------------|-----------|
| NiFeCo-LHD@MXene                                                            | 1M KOH      | 130 @ 10 mA/cm <sup>2</sup>   | 52                                  | This work |
| FeNi <sub>3</sub> N/NF                                                      | 1M KOH      | 202 @ 10 mA/cm <sup>2</sup>   | 40                                  | [2]       |
| NiS/Ni                                                                      | 1M KOH      | 335 @ 50 mA/cm <sup>2</sup>   | 89                                  | [3]       |
| np-(Co <sub>0.52</sub> Fe <sub>0.48</sub> ) <sub>2</sub> P                  | 1M KOH      | 270 @ 10 mA/cm <sup>2</sup>   | 30                                  | [4]       |
| NiFeCoP/NF Nanorod                                                          | 1M KOH      | 244.4@100 mA/cm               | 40.90                               | [8]       |
| Ru-NiCoP/NF                                                                 | 1M KOH      | 233.77@ 50 mA/cm <sup>2</sup> | 52.66                               | [9]       |
| NiFe/NiCo <sub>2</sub> O <sub>4</sub> /Ni                                   | 1M KOH      | 240@10 mA/cm <sup>2</sup>     | 38.8                                | [10]      |
| Ripple-like sNiFeCo/NF                                                      | 1M KOH      | 180 @ 100 mA/cm <sup>2</sup>  | 50.4                                | [26]      |
| FeNi@MXene (Mo <sub>2</sub> TiC <sub>2</sub> T <sub>x</sub> )               | 1M KOH      | 190@ 10 mA/cm <sup>2</sup>    | 42.78                               | [6]       |
| np-NiFeCoP                                                                  | 1M KOH      | 220@10 mA/cm                  | 41.4                                | [11]      |
| NiFeS/NF                                                                    | 1M KOH      | 189 @ 100 mA/cm <sup>2</sup>  | 119.4                               | [27]      |
| CoP/Mo <sub>2</sub> CT <sub>x</sub>                                         | 1M KOH      | 260@10 mA/cm                  | 51                                  | [14]      |
| Ni-Fe LDH hollow nanoprisms                                                 | 1M KOH      | 280 @ 100 mA/cm <sup>2</sup>  | 49.4                                | [28]      |
| NiFeCoP/NF                                                                  | 1M KOH      | 109@10 mA/cm                  | 40.90                               | [8]       |
| CoFe-LDH on MXene                                                           | 1M KOH      | 319 @ 10 mA/cm <sup>2</sup>   | 50                                  | [29]      |
| Ni-Co-Sn                                                                    | 1M KOH      | 270@10 mA/cm                  | 62                                  | [15]      |
| Au/Ni <sub>3</sub> S <sub>2</sub>                                           | 1M KOH      | 230@10 mA/cm                  | 51                                  | [19]      |
| FeNi-LDH/Ti <sub>3</sub> C <sub>2</sub> -MXene                              | 1M KOH      | 250 @ 10 mA/cm <sup>2</sup>   | 42                                  | [30]      |
| Ru-NiCoP/NF                                                                 | 1M KOH      | 233.77@ 50 mA/cm <sup>2</sup> | 52.66                               | [9]       |
| Ti <sub>3</sub> C <sub>2</sub> T <sub>x</sub> /TiO <sub>2</sub> /NiFeCo-LDH | 1M KOH      | 155 @ 10 mA/cm <sup>2</sup>   | 98.4                                | [31]      |
| NiFeCuP@Ni <sub>3</sub> S <sub>2</sub>                                      | 1M KOH      | 230@ 10 mA/cm <sup>2</sup>    | 42                                  | [32]      |
| p-NFNR@Ni-Co-P                                                              | 1M KOH      | 272@10 mA/cm                  | 62                                  | [17]      |
| Ni <sub>x</sub> Fe <sub>1-x</sub> Se <sub>2</sub> -DO                       | 1M KOH      | 195 @ 10 mA/cm <sup>2</sup>   | 28                                  | [33]      |
| Co <sub>3</sub> O <sub>4</sub> /Co-Fe oxide                                 | 1M KOH      | 279 @ 10 mA/cm <sup>2</sup>   | 61                                  | [34]      |
| CoP/Ni <sub>2</sub> P@HPNCP                                                 | 1M KOH      | 294@10 mA/cm                  | 65.5                                | [22]      |
| a-NiFe-OH/NiFeP                                                             | 1M KOH      | 199 @ 10 mA/cm <sup>2</sup>   | 39                                  | [35]      |
| Ni <sub>2</sub> CoFe- LDH/N-GO                                              | 1M KOH      | 151 @ 10 mA/cm <sup>2</sup>   | 56.8                                | [36]      |
| NiFe- LDH/CNT                                                               | 1M KOH      | 154 @ 10 mA/cm <sup>2</sup>   | 35                                  | [37]      |
| Carbon-QD/NiFe- LDH                                                         | 1M KOH      | 151 @ 10 mA/cm <sup>2</sup>   | 30                                  | [38]      |
| (Ni <sub>x</sub> Co) <sub>0.85</sub> Se@ NiCo LDH                           | 1M KOH      | 216 @ 10 mA/cm <sup>2</sup>   | 85                                  | [39]      |
| Ti <sub>2</sub> NT <sub>x</sub> @MOF-CoP                                    | 1M KOH      | 241@50 mA/cm                  | 96.7                                | [23]      |
| Mo-NiCoP                                                                    | 1M KOH      | 269@10 mA/cm                  | 76.7                                | [24]      |
| CoNi LDH/Ti <sub>3</sub> C <sub>2</sub> T                                   | 1M KOH      | 257.4@100 mA/cm               | 68                                  | [40]      |
| NiFeP/MXene                                                                 | 1M KOH      | 286@50 mA/cm                  | 35                                  | [41]      |
| NiFe LDH/Ti <sub>3</sub> C <sub>2</sub> T <sub>x</sub> /NF                  | 1M KOH      | 200@10 mA/cm                  | 64.2                                | [42]      |



**Table S3.** Comparison of overall water splitting of NiFeCo-LHD@MXene with various electrocatalysts.

| Electrocatalyst.                                           | Electrolyte | $\eta$ (V) @ 10 mA/cm <sup>2</sup> | Ref       |
|------------------------------------------------------------|-------------|------------------------------------|-----------|
| NiFeCo-LHD@MXene                                           | 1M KOH      | 1.41                               | This work |
| NiS/Ni                                                     | 1M KOH      | 1.64                               | [3]       |
| np-(Co <sub>0.52</sub> Fe <sub>0.48</sub> ) <sub>2</sub> P | 1M KOH      | 1.53                               | [4]       |
| NiFeCoP/NF                                                 | 1M KOH      | 1.56 @ 30 mA/cm <sup>2</sup>       | [8]       |
| Ru-NiCoP/NF                                                | 1M KOH      | 1.50 @ 30 mA/cm <sup>2</sup>       | [9]       |
| CoP/Mo <sub>2</sub> CT <sub>x</sub>                        | 1M KOH      | 1.56                               | [14]      |
| Ni-Co-Sn                                                   | 1M KOH      | 1.76 @ 50 mA/cm <sup>2</sup>       | [15]      |
| p-NFNR@Ni-Co-P                                             | 1M KOH      | 1.62                               | [17]      |
| CoP/Ni <sub>2</sub> P@HPNCP                                | 1M KOH      | 1.59                               | [22]      |
| Ti <sub>2</sub> NT <sub>x</sub> @MOF-CoP                   | 1M KOH      | 1.61                               | [23]      |
| Mo-NiCoP                                                   | 1M KOH      | 1.61                               | [24]      |
| NiFeP/MXene                                                | 1M KOH      | 1.61                               | [41]      |

## References

- Zhang, Y.; Gao, L.; Hensen, E.J.M.; Hofmann, J.P. Evaluating the stability of co<sub>2</sub>p electrocatalysts in the hydrogen evolution reaction for both acidic and alkaline electrolytes. *ACS Energy Lett.* **2018**, *3*, 1360–1365.
- Zhang, B.; Xiao, C.; Xie, S.; Liang, J.; Chen, X.; Tang, Y. Iron–nickel nitride nanostructures in situ grown on surface-redox-etching nickel foam: Efficient and ultrasustainable electrocatalysts for overall water splitting. *Chem. Mater.* **2016**, *28*, 6934–6941.
- Zhu, W.; Yue, X.; Zhang, W.; Yu, S.; Zhang, Y.; Wang, J.; Wang, J. Nickel sulfide microsphere film on ni foam as an efficient bifunctional electrocatalyst for overall water splitting. *Chem. Commun.* **2016**, *52*, 1486–1489.
- Tan, Y.; Wang, H.; Liu, P.; Shen, Y.; Cheng, C.; Hirata, A.; Fujita, T.; Tang, Z.; Chen, M. Versatile nanoporous bimetallic phosphides towards electrochemical water splitting. *Energy Environ. Sci.* **2016**, *9*, 2257–2261.
- Djire, A.; Wang, X.; Xiao, C.; Nwamba, O.C.; Mirkin, M.V.; Neale, N.R. Basal plane hydrogen evolution activity from mixed metal nitride mxenes measured by scanning electrochemical microscopy. *Adv. Funct. Mater.* **2020**, *30*, 2001136.
- Wang, J.; He, P.; Shen, Y.; Dai, L.; Li, Z.; Wu, Y.; An, C. Feni nanoparticles on mo<sub>2</sub>tic<sub>2</sub>tx mxene@ nickel foam as robust electrocatalysts for overall water splitting. *Nano Res.* **2021**, *14*, 3474–3481.
- Wang, W.; Zhao, H.; Du, Y.; Yang, Y.; Li, S.; Yang, B.; Liu, Y.; Wang, L. Rational design and controlled synthesis of v-doped ni<sub>3</sub>s<sub>2</sub>/nixpy heterostructured nanosheets for the hydrogen evolution reaction. *Chem.–A Eur. J.* **2021**, *27*, 2463–2468.
- Cen, J.; Wu, L.; Zeng, Y.; Ali, A.; Zhu, Y.; Shen, P.K. Heterogeneous nifecop/nf nanorods as a bifunctional electrocatalyst for efficient water electrolysis. *ChemCatChem* **2021**, *13*, 4602–4609.
- Cen, J.; Shen, P.K.; Zeng, Y. Ru doping nicop hetero-nanowires with modulated electronic structure for efficient overall water splitting. *J. Colloid Interface Sci.* **2022**, *610*, 213–220.
- Xiao, C.; Li, Y.; Lu, X.; Zhao, C. Bifunctional porous nife/nico<sub>2</sub>o<sub>4</sub>/ni foam electrodes with triple hierarchy and double synergies for efficient whole cell water splitting. *Adv. Funct. Mater.* **2016**, *26*, 3515–3523.
- Pang, Y.; Xu, W.; Zhu, S.; Cui, Z.; Liang, Y.; Li, Z.; Wu, S.; Chang, C.; Luo, S. Self-supporting amorphous nanoporous nifecop electrocatalyst for efficient overall water splitting. *J. Mater. Sci. Technol.* **2021**, *82*, 96–104.
- Ai, Z.; Chang, B.; Xu, C.; Huang, B.; Wu, Y.; Hao, X.; Shao, Y. Interface engineering in the bnns@ ti<sub>3</sub>c<sub>2</sub> intercalation structure for enhanced electrocatalytic hydrogen evolution. *New J. Chem.* **2019**, *43*, 8613–8619.
- Le, T.A.; Tran, N.Q.; Hong, Y.; Kim, M.; Lee, H. Porosity-engineering of mxene as a support material for a highly efficient electrocatalyst toward overall water splitting. *ChemSusChem* **2020**, *13*, 945–955.
- Liu, S.; Lin, Z.; Wan, R.; Liu, Y.; Liu, Z.; Zhang, S.; Zhang, X.; Tang, Z.; Lu, X.; Tian, Y. Cobalt phosphide supported by two-dimensional molybdenum carbide (mxene) for the hydrogen evolution reaction, oxygen evolution reaction, and overall water splitting. *J. Mater. Chem. A* **2021**, *9*, 21259–21269.
- Liu, Y.; Lu, H.; Kou, X. Electrodeposited ni-co-sn alloy as a highly efficient electrocatalyst for water splitting. *Int. J. Hydrogen Energy* **2019**, *44*, 8099–8108.
- Park, S.; Lee, Y.-L.; Yoon, Y.; Park, S.Y.; Yim, S.; Song, W.; Myung, S.; Lee, K.-S.; Chang, H.; Lee, S.S. Reducing the high hydrogen binding strength of vanadium carbide mxene with atomic pt confinement for high activity toward her. *Appl. Catal. B Environ.* **2022**, *304*, 120989.
- Feng, Y.; Wang, R.; Dong, P.; Wang, X.; Feng, W.; Chen, J.; Cao, L.; Feng, L.; He, C.; Huang, J. Enhanced electrocatalytic activity of nickel cobalt phosphide nanoparticles anchored on porous n-doped fullerene nanorod for efficient overall water splitting. *ACS Appl. Mater. Interfaces* **2021**, *13*, 48949–48961.
- Ren, J.; Zong, H.; Sun, Y.; Gong, S.; Feng, Y.; Wang, Z.; Hu, L.; Yu, K.; Zhu, Z. 2d organ-like molybdenum carbide (mxene) coupled with mos<sub>2</sub> nanoflowers enhances the catalytic activity in the hydrogen evolution reaction. *CrystEngComm* **2020**, *22*, 1395–1403.



19. Liu, H.; Cheng, J.; He, W.; Li, Y.; Mao, J.; Zheng, X.; Chen, C.; Cui, C.; Hao, Q. Interfacial electronic modulation of ni<sub>3</sub>s<sub>2</sub> nanosheet arrays decorated with au nanoparticles boosts overall water splitting. *Appl. Catal. B Environ.* **2022**, *304*, 120935.
20. Cui, B.; Hu, B.; Liu, J.; Wang, M.; Song, Y.; Tian, K.; Zhang, Z.; He, L. Solution-plasma-assisted bimetallic oxide alloy nanoparticles of pt and pd embedded within two-dimensional ti<sub>3</sub>c<sub>2</sub>t<sub>x</sub> nanosheets as highly active electrocatalysts for overall water splitting. *ACS Appl. Mater. Interfaces* **2018**, *10*, 23858–23873.
21. Du, C.F.; Sun, X.; Yu, H.; Fang, W.; Jing, Y.; Wang, Y.; Li, S.; Liu, X.; Yan, Q. V<sub>4</sub>c<sub>3</sub>t<sub>x</sub> mxene: A promising active substrate for reactive surface modification and the enhanced electrocatalytic oxygen evolution activity. *InfoMat* **2020**, *2*, 950–959.
22. Zhang, R.; Zhu, R.; Li, Y.; Hui, Z.; Song, Y.; Cheng, Y.; Lu, J. Cop and ni<sub>2</sub>p implanted in a hollow porous n-doped carbon polyhedron for ph universal hydrogen evolution reaction and alkaline overall water splitting. *Nanoscale* **2020**, *12*, 23851–23858.
23. Zong, H.; Qi, R.; Yu, K.; Zhu, Z. Ultrathin ti<sub>2</sub>nt<sub>x</sub> mxene-wrapped mof-derived cop frameworks towards hydrogen evolution and water oxidation. *Electrochim. Acta* **2021**, *393*, 139068.
24. Lin, J.; Yan, Y.; Li, C.; Si, X.; Wang, H.; Qi, J.; Cao, J.; Zhong, Z.; Fei, W.; Feng, J. Bifunctional electrocatalysts based on mo-doped nicop nanosheet arrays for overall water splitting. *Nano-Micro Lett.* **2019**, *11*, 55.
25. Shen, B.; Huang, H.; Jiang, Y.; Xue, Y.; He, H. 3D interweaving mxene–graphene network–confined ni–fe layered double hydroxide nanosheets for enhanced hydrogen evolution. *Electrochim. Acta* **2022**, *407*, 139913.
26. Chai, Y.-M.; Shang, X.; Liu, Z.-Z.; Dong, B.; Han, G.-Q.; Gao, W.-K.; Chi, J.-Q.; Yan, K.-L.; Liu, C.-G. Ripple-like nifeco sulfides on nickel foam derived from in-situ sulfurization of precursor oxides as efficient anodes for water oxidation. *Appl. Surf. Sci.* **2018**, *428*, 370–376.
27. Dong, B.; Zhao, X.; Han, G.-Q.; Li, X.; Shang, X.; Liu, Y.-R.; Hu, W.-H.; Chai, Y.-M.; Zhao, H.; Liu, C.-G. Two-step synthesis of binary ni–fe sulfides supported on nickel foam as highly efficient electrocatalysts for the oxygen evolution reaction. *J. Mater. Chem. A* **2016**, *4*, 13499–13508.
28. Yu, L.; Yang, J.F.; Guan, B.Y.; Lu, Y.; Lou, X.W. Hierarchical hollow nanoprisms based on ultrathin ni–fe layered double hydroxide nanosheets with enhanced electrocatalytic activity towards oxygen evolution. *Angew. Chem. Int. Ed.* **2018**, *57*, 172–176.
29. Hao, C.; Wu, Y.; An, Y.; Cui, B.; Lin, J.; Li, X.; Wang, D.; Jiang, M.; Cheng, Z.; Hu, S. Interface-coupling of cofe-ldh on mxene as high-performance oxygen evolution catalyst. *Mater. Today Energy* **2019**, *12*, 453–462.
30. Yu, M.; Zhou, S.; Wang, Z.; Zhao, J.; Qiu, J. Boosting electrocatalytic oxygen evolution by synergistically coupling layered double hydroxide with mxene. *Nano Energy* **2018**, *44*, 181–190.
31. Hao, N.; Wei, Y.; Wang, J.; Wang, Z.; Zhu, Z.; Zhao, S.; Han, M.; Huang, X. In situ hybridization of an mxene/tio<sub>2</sub>/nifeco-layered double hydroxide composite for electrochemical and photoelectrochemical oxygen evolution. *RSC Adv.* **2018**, *8*, 20576–20584.
32. Khodabakhshi, M.; Chen, S.; Ye, T.; Wu, H.; Yang, L.; Zhang, W.; Chang, H. Hierarchical highly wrinkled trimetallic nifecu phosphide nanosheets on nanodendrite ni<sub>3</sub>s<sub>2</sub>/ni foam as an efficient electrocatalyst for the oxygen evolution reaction. *ACS Appl. Mater. Interfaces* **2020**, *12*, 36268–36276.
33. Xu, X.; Song, F.; Hu, X. A nickel iron diselenide-derived efficient oxygen-evolution catalyst. *Nat. Commun.* **2016**, *7*, 12324.
34. Wang, X.; Yu, L.; Guan, B.Y.; Song, S.; Lou, X.W. Metal–organic framework hybrid-assisted formation of co<sub>3</sub>o<sub>4</sub>/co–fe oxide double-shelled nanoboxes for enhanced oxygen evolution. *Adv. Mater.* **2018**, *30*, 1801211.
35. Liang, H.; Gandi, A.N.; Xia, C.; Hedhili, M.N.; Anjum, D.H.; Schwingschlogl, U.; Alshareef, H.N. Amorphous nife-oh/nifep electrocatalyst fabricated at low temperature for water oxidation applications. *ACS Energy Lett.* **2017**, *2*, 1035–1042.
36. Zhou, D.; Cai, Z.; Lei, X.; Tian, W.; Bi, Y.; Jia, Y.; Han, N.; Gao, T.; Zhang, Q.; Kuang, Y. Nicofe-layered double hydroxides/n-doped graphene oxide array colloid composite as an efficient bifunctional catalyst for oxygen electrocatalytic reactions. *Adv. Energy Mater.* **2018**, *8*, 1701905.
37. Gong, M.; Li, Y.; Wang, H.; Liang, Y.; Wu, J.Z.; Zhou, J.; Wang, J.; Regier, T.; Wei, F.; Dai, H. An advanced ni–fe layered double hydroxide electrocatalyst for water oxidation. *J. Am. Chem. Soc.* **2013**, *135*, 8452–8455.
38. Tang, D.; Liu, J.; Wu, X.; Liu, R.; Han, X.; Han, Y.; Huang, H.; Liu, Y.; Kang, Z. Carbon quantum dot/nife layered double-hydroxide composite as a highly efficient electrocatalyst for water oxidation. *ACS Appl. Mater. Interfaces* **2014**, *6*, 7918–7925.
39. Xia, C.; Jiang, Q.; Zhao, C.; Hedhili, M.N.; Alshareef, H.N. Selenide-based electrocatalysts and scaffolds for water oxidation applications. *Adv. Mater.* **2016**, *28*, 77–85.
40. Hu, L.; Li, M.; Wei, X.; Wang, H.; Wu, Y.; Wen, J.; Gu, W.; Zhu, C. Modulating interfacial electronic structure of conil dh nanosheets with ti<sub>3</sub>c<sub>2</sub>t<sub>x</sub> mxene for enhancing water oxidation catalysis. *Chem. Eng. J.* **2020**, *398*, 125605.
41. Chen, J.; Long, Q.; Xiao, K.; Ouyang, T.; Li, N.; Ye, S.; Liu, Z.-Q. Vertically-interlaced nifep/mxene electrocatalyst with tunable electronic structure for high-efficiency oxygen evolution reaction. *Sci. Bull.* **2021**, *66*, 1063–1072.
42. Li, Z.; Wang, X.; Ren, J.; Wang, H. Nife ldh/ti<sub>3</sub>c<sub>2</sub>t<sub>x</sub>/nickel foam as a binder-free electrode with enhanced oxygen evolution reaction performance. *Int. J. Hydrogen Energy* **2022**, *47*, 3886–3892.
